# Supplementary material
Source: PubMed Central journal article supplement (PMC2844214)

**Supplemental Table S1****Crystallographic data of mutant Fv–HEL complexes**

|                                        | L-N31D                                               | L-N32D                                               | L-N92D                                               | Wild-type <sup>a</sup>                               |
|----------------------------------------|------------------------------------------------------|------------------------------------------------------|------------------------------------------------------|------------------------------------------------------|
| Space group,                           | <i>P</i> 4 <sub>1</sub> 2 <sub>1</sub> 2             |
| Unit cell dimensions                   | <i>a</i> = <i>b</i> = 56.58 Å<br><i>c</i> = 234.43 Å | <i>a</i> = <i>b</i> = 56.56 Å<br><i>c</i> = 233.55 Å | <i>a</i> = <i>b</i> = 56.57 Å<br><i>c</i> = 234.68 Å | <i>a</i> = <i>b</i> = 56.44 Å<br><i>c</i> = 234.49 Å |
| Wavelength (Å)                         | 1.000                                                | 1.000                                                | 1.000                                                | 1.000                                                |
| Unique reflections                     | 36648                                                | 36331                                                | 34947                                                | 36103                                                |
| Resolution (Å)                         | 1.8                                                  | 1.8                                                  | 1.8                                                  | 1.8                                                  |
| <i>R</i> <sub>merge</sub> <sup>b</sup> | 0.062 (0.200)                                        | 0.069 (0.258)                                        | 0.078 (0.241)                                        | 0.064 (0.181)                                        |
| Completeness (%)                       | 100 (100)                                            | 99.8 (99.9)                                          | 96.6 (89.7)                                          | 99.4 (98.8)                                          |
| Multiplicity                           | 13.9                                                 | 14.1                                                 | 8.0                                                  | 7.0                                                  |
| Resolution range (Å)                   | 8.0 – 1.8                                            | 8.0 – 1.8                                            | 8.0 – 1.8                                            | 8.0 – 1.8                                            |
| Total reflections used                 | 36059                                                | 35777                                                | 34484                                                | 35592                                                |
| <i>R</i> -factor <sup>c</sup> (%)      | 18.9                                                 | 19.4                                                 | 18.6                                                 | 19.4                                                 |
| Free <i>R</i> -factor (%)              | 22.5                                                 | 22.2                                                 | 21.6                                                 | 21.9                                                 |
| RMSD bond length (Å)                   | 0.005                                                | 0.005                                                | 0.004                                                | 0.004                                                |
| RMSD bond angle (°)                    | 1.30                                                 | 1.30                                                 | 1.30                                                 | 1.30                                                 |
| Water molecules                        | 376                                                  | 386                                                  | 393                                                  | 330                                                  |

<sup>a</sup> Data of 2DQJ (55)

$$^b R_{\text{merge}} = \frac{\sum_{hkl} |I - \langle I \rangle|}{\sum_{hkl} \langle I \rangle}$$

$$^c R\text{-factor} = \frac{\sum ||F_{\text{obs}}| - |F_{\text{calc}}||}{\sum |F_{\text{obs}}|}$$

**Supplemental Table S2**

**Hydrogen bonds via interfacial water molecules (No.1)**

| WT <sup>a</sup> |         |     | LN31D             |         |     | LN32D  |         |     | LN92D  |         |     |
|-----------------|---------|-----|-------------------|---------|-----|--------|---------|-----|--------|---------|-----|
| W2              | YTyr20  | Oη  | W18               | YTyr20  | Oη  | W242   | YTyr20  | Oη  | W2     | YTyr20  | Oη  |
|                 | LTyr50  | Oη  | (W2) <sup>b</sup> | LTyr50  | Oη  | (W2)   | LTyr50  | Oη  | (W2)   | LTyr50  | Oη  |
|                 | LSer91  | Oγ  |                   | LSer91  | Oγ  |        | LSer91  | Oγ  |        | LSer91  | Oγ  |
| W5              | LTyr50  | Oη  | W3                | LTyr50  | Oη  | W10    | LTyr50  | Oη  | W6     | LTyr50  | Oη  |
|                 | YAsn93  | O   | (W5)              | YAsn93  | O   | (W5)   | YAsn93  | O   | (W5)   | YAsn93  | O   |
| W8              | LGln53  | Nε2 |                   |         |     | W4     | LGln53  | Nε2 | W1     | LGln53  | Nε2 |
|                 | YHis15  | Nδ1 |                   |         |     | (W8)   | YHis15  | Nδ1 | (W8)   | YHis15  | Nδ1 |
|                 | YThr89  | O   |                   |         |     |        | YThr89  | O   |        | YThr89  | O   |
|                 | YAsn93  | Oδ1 |                   |         |     |        | YAsn93  | Oδ1 |        | YAsn93  | Oδ1 |
| W10             | LSer91  | O   | W2                | LSer91  | O   | W8     | LSer91  | O   | W8     | LSer91  | O   |
|                 | YTyr20  | Oη  | (W10)             | YTyr20  | Oη  | (W10)  | YTyr20  | Oη  | (W10)  | YTyr20  | Oη  |
|                 | LTyr96  | Oη  |                   | LTyr96  | Oη  |        | LTyr96  | Oη  |        | LTyr96  | Oη  |
|                 | YArg21  | Nη1 |                   | YArg21  | Nη1 |        | YArg21  | Nη1 |        | YArg21  | Nη1 |
|                 | YSer100 | Oγ  |                   | YSer100 | Oγ  |        | YSer100 | Oγ  |        | YSer100 | Oγ  |
| W13             | LAsn31  | Nδ2 | W19               | LAsp31  | Oδ2 | W16    | LAsn31  | Nδ2 | W14    | LAsn31  | Nδ2 |
|                 | YAsn93  | Oδ1 | (W13)             | YAsn93  | Oδ1 | (W13)  | YAsn93  | Oδ1 | (W13)  | YAsn93  | Oδ1 |
|                 | YLys96  | Nζ  |                   | YLys96  | Nζ  |        | YLys96  | Nζ  |        | YLys96  | Nζ  |
| W53             | LTrp94  | N   | W49               | LTrp94  | N   |        |         |     |        |         |     |
|                 | YArg21  | Nε  | (W53)             | YArg21  | Nε  |        |         |     |        |         |     |
| W81             | HTyr58  | Oη  | W82               | HTyr58  | Oη  | W109   | HTyr58  | Oη  | W97    | HTyr58  | Oη  |
|                 | YVal99  | O   | (W81)             | YVal99  | O   | (W81)  | YVal99  | O   | (W81)  | YVal99  | O   |
|                 |         |     |                   | YAsp101 | O   |        | YAsp101 | O   |        | YAsp101 | O   |
| W86             | LSer93  | Oγ  | W45               | LSer93  | Oγ  | W89    |         |     | W29    | LSer93  | Oγ  |
|                 |         |     | (W86)             |         |     | (W86)  | LSer92  | O   | (W86)  |         |     |
|                 | YAsn19  | O   |                   | YAsn19  | O   |        |         |     |        |         |     |
|                 | YArg21  | N   |                   | YArg21  | N   |        | YArg21  | N   |        |         |     |
|                 | YGly22  | N   |                   | YGly22  | N   |        | YGly22  | N   |        | YGly22  | N   |
| W178            | LSer28  | Oγ  |                   |         |     |        |         |     |        |         |     |
|                 | LGly30  | N   |                   |         |     |        |         |     |        |         |     |
|                 | YAsp18  | O   |                   |         |     |        |         |     |        |         |     |
| W200            |         |     | W50               |         |     | W34    | Llle29  | O   | W95    |         |     |
|                 |         |     | (W200)            |         |     | (W200) | LAsp32  | Oδ2 | (W200) | LAsn32  | Nδ2 |
|                 | LAsn92  | Oδ1 |                   | LAsn92  | Oδ1 |        | LAsn92  | Oδ1 |        | LAsp92  | Oδ1 |
|                 | YGly16  | O   |                   | YGly16  | O   |        | YGly16  | O   |        | YGly16  | O   |
|                 | YAsp18  | O   |                   | YAsn19  | N   |        |         |     |        |         |     |
| W255            | HAsp99  | Oδ2 | W159              | HAsp99  | Oδ2 | W353   | HAsp99  | Oδ2 |        |         |     |
|                 | YAsn77  | Nδ2 | (W255)            | YAsn77  | Nδ2 | (W255) | YAsn77  | Nδ2 |        |         |     |
|                 | HAsp101 | Oδ2 |                   | HAsp101 | Oδ2 |        | HAsp101 | Oδ2 |        |         |     |
|                 |         |     |                   | HAsn97  | OD1 |        | HAsn97  | OD1 |        |         |     |

**Supplemental Table S2**  
**Hydrogen bonds via interfacial water molecules (No.2)**

| WT   |         |     | LN31D  |         |     | LN32D  |         |     | LN92D  |        |     |
|------|---------|-----|--------|---------|-----|--------|---------|-----|--------|--------|-----|
| W255 | HAsp99  | Oδ2 | W159   | HAsp99  | Oδ2 | W353   | HAsp99  | Oδ2 |        |        |     |
|      | YAsn77  | Nδ2 | (W255) | YAsn77  | Nδ2 | (W255) | YAsn77  | Nδ2 |        |        |     |
|      | HAsp101 | Oδ2 |        | HAsp101 | Oδ2 |        | HAsp101 | Oδ2 |        |        |     |
|      |         |     |        | HAsn97  | OD1 |        | HAsn97  | OD1 |        |        |     |
| W295 | HSer31  | O   | W267   | HSer31  | O   | W377   | HSer31  | O   | W360   | HSer31 | O   |
|      | YAsn74  | O   | (W295) | YAsn74  | O   | (W295) | YAsn74  | O   | (W295) | YAsn74 | O   |
|      | YAsn77  | Oδ1 |        | YAsn77  | Oδ1 |        | YAsn77  | Oδ1 |        | YAsn77 | Oδ1 |
|      |         |     | W366   | HAsp27  | Oδ2 | W138   | HAsp27  | Oδ2 | W176   | HAsp27 | Oδ1 |
|      |         |     |        | YArg73  | O   |        | YArg73  | O   |        | YArg73 | O   |
|      |         |     |        |         |     | W362   | HThr30  | O   | W382   | HThr30 | O   |
|      |         |     |        |         |     |        | YArg73  | Nη1 |        | YArg73 | Nη1 |
|      |         |     |        |         |     | W149   | HAsp32  | Oδ2 | W57    | LSer93 | Oγ  |
|      |         |     |        |         |     |        | HSer31  | O   |        | LAsp92 | Oδ2 |
|      |         |     |        |         |     |        | YAsn77  | Oδ1 |        | YAsn19 | O   |
|      |         |     |        |         |     | W382   | LAsn92  | Nδ2 | W296   | LAsp92 | Oδ1 |
|      |         |     |        |         |     |        | YAsn19  | O   |        | YAsp18 | O   |

<sup>a</sup> Data of 2DQJ (55)

<sup>b</sup> Parentheses indicate corresponding water molecules in the wild-type complex.

**Supplemental Table S3**  
**Interfacial areas of the mutant Fv–HEL complexes (Å<sup>2</sup>).**

| Complex   | VL        | VH       | HEL       | Total       |
|-----------|-----------|----------|-----------|-------------|
| Wild type | 361       | 529      | 990       | 1880        |
| LN31D     | 357 (-4)  | 538 (+9) | 977 (-13) | 1872 (-8)   |
| LN32D     | 311 (-50) | 530 (+1) | 923 (-67) | 1764 (-116) |
| LN92D     | 330 (-31) | 527 (-2) | 940 (-50) | 1797 (-83)  |

Interfacial areas were calculated with the program NACCESS. The default values were probe radius; 1.4Å, z-slice; 0.05Å, and van der Waals radii. Values in parentheses are differences from those of the wild-type complex.

**Supplemental Table S4**

**Interactions between each mutant Fv and HEL in the complexes.**

VL (No.1)

|        |                | WT <sup>a</sup>      |                | LN31D                |                | LN32D                |                | LN92D                |  |
|--------|----------------|----------------------|----------------|----------------------|----------------|----------------------|----------------|----------------------|--|
| LAsn30 | C $\alpha$     |                      | C $\alpha$     | Gly16 C $\alpha$     |                |                      |                |                      |  |
| LAsn31 | C $\gamma$     | His15 C              |  |
| (Ala)  |                | His15 O              |                |                      |                | His15 O              |                | His15 O              |  |
| (Asp)  |                | Gly16 N              |                | Gly16 N              |                | ( <del>7</del> 3.95) |                |                      |  |
|        |                | Gly16 C $\alpha$     |  |
|        |                | Lys96 N $\zeta$      |  |
|        | O $\delta$ 1   | His15 C              | O $\delta$ 1   | His15 C              | O $\delta$ 1   | His15 C              | O $\delta$ 1   | Gly16 C $\alpha$     |  |
|        |                | Gly16 C $\alpha$     |                | Gly16 C $\alpha$     |                | His15 O              |                | His15 O              |  |
|        |                |                      |                |                      |                | Gly16 C $\alpha$     |                | His15 C              |  |
|        |                | Lys96 N $\zeta$      |  |
|        | N $\delta$ 2   | His15 C              | O $\delta$ 2   | His15 C              | N $\delta$ 2   | His15 C              | N $\delta$ 2   | His15 C              |  |
|        |                | His15 O              |                |                      |                | His15 O              |                | His15 O              |  |
| LAsn32 | C $\gamma$     | Tyr20 C $\delta$ 1   |  |
| (Ala)  |                | Tyr20 C $\epsilon$ 1 |  |
| (Asp)  |                | Lys96 N $\zeta$      |  |
|        | O $\delta$ 1   | Tyr20 C $\delta$ 1   | O $\delta$ 1   | Tyr20 C $\delta$ 1   | O $\delta$ 1   |                      | O $\delta$ 1   | Tyr20 C $\delta$ 1   |  |
|        |                | Tyr20 C $\epsilon$ 1 |  |
|        |                | Lys96 C $\delta$     |  |
|        |                | Lys96 C $\epsilon$   |  |
|        |                | Lys96 N $\zeta$      |  |
|        | N $\delta$ 2   | Gly16 O              | N $\delta$ 2   | Gly16 O              | O $\delta$ 2   | Tyr20 C $\delta$ 1   | N $\delta$ 2   | Gly16 O              |  |
|        |                | Tyr20 C $\delta$ 1   |                | Tyr20 C $\delta$ 1   |                | Tyr20 C $\epsilon$ 1 |                | Tyr20 C $\delta$ 1   |  |
| LTyr50 | C $\delta$ 1   | Lys96 N $\zeta$      |  |
|        |                |                      |                | Lys96 C $\delta$     |                |                      |                |                      |  |
|        | C $\epsilon$ 1 | Lys96 N $\zeta$      |  |
|        |                | Lys96 C $\delta$     |  |
|        | C $\delta$ 2   | Asn93 C $\gamma$     |  |
|        |                | Asn93 O $\delta$ 1   |  |
|        | C $\epsilon$ 2 | Asn93 C $\gamma$     |  |
|        |                | Asn93 O $\delta$ 1   |  |
|        | C $\zeta$      | Lys96 C $\delta$     |  |
|        | O $\eta$       | Lys96 C $\delta$     | O $\eta$       | Lys96 C $\delta$     | O $\eta$       |                      | O $\eta$       | Lys96 C $\delta$     |  |
| LGln53 | C $\delta$     | Thr89 C $\gamma$ 2   |  |
|        |                | Asn93 N $\delta$ 2   |  |
|        | O $\epsilon$ 1 | Thr89 C $\gamma$ 2   | O $\epsilon$ 1 | Thr89 C $\gamma$ 2   | O $\epsilon$ 1 | Thr89 C $\gamma$ 2   | O $\epsilon$ 1 | Thr89 C $\gamma$ 2   |  |
|        |                | Asn93 C $\gamma$     |                | Gly16 C $\alpha$     |                | Asn93 C $\gamma$     |                | Asn93 C $\gamma$     |  |
|        |                | Asn93 N $\delta$ 2   |  |
|        | N $\epsilon$ 2 | Thr89 C $\gamma$ 2   | N $\epsilon$ 2 | Thr89 C $\gamma$ 2   | N $\epsilon$ 2 | Thr89 C $\gamma$ 2   | N $\epsilon$ 2 | Thr89 C $\gamma$ 2   |  |
|        |                | Asn93 O $\delta$ 1   |  |

## VL (No.2)

|        | WT  |           | LN31D |           | LN32D |           | LN92D |           |
|--------|-----|-----------|-------|-----------|-------|-----------|-------|-----------|
| LSer91 | O   | Tyr20 Cε1 | O     | Tyr20 Cε1 | O     |           | O     | Tyr20 Cε1 |
| LAsn92 | Nδ2 | Asn19 O   | Nδ2   | Asn19 O   | Nδ2   |           |       |           |
| (Ala)  | C   | Arg21 Cδ  | C     | Arg21 Cδ  | C     |           | C     |           |
| (Asp)  | O   | Arg21 N   | O     | Arg21 N   | O     | Arg21 N   | O     | Arg21 N   |
|        |     | Arg21 Cα  |       | Arg21 Cα  |       |           |       | Arg21 Cα  |
|        |     | Arg21 Cδ  |       | Arg21 Cδ  |       | Arg21 Cδ  |       | Arg21 Cδ  |
|        |     |           |       |           | Oδ1   | Asn19 O   | Oδ2   |           |
| LSer93 | Cα  | Arg21 Cδ  | Cα    | Arg21 Cδ  | Cα    |           | Cα    |           |
| LTrp94 | Cβ  | Arg21 Cζ  | Cβ    | Arg21 Cζ  | Cβ    | Arg21 Cζ  | Cβ    | Arg21 Cζ  |
|        |     |           |       |           |       |           |       | Arg21 Nη2 |
| LTyr96 | Cε1 | Arg21 Nη1 | Cε1   | Arg21 Nη1 | Cε1   | but 3.85  | Cε1   | Arg21 Nη1 |
|        |     |           | Cζ    | Arg21 Nη1 |       |           | Cζ    | Arg21 Nη1 |
|        | Oη  | Arg21 Nη1 | Oη    | Arg21 Nη1 | Oη    | Arg21 Nη1 | Oη    | Arg21 Nη1 |

VH (No.1)

|        |     | WT                                                                                           |     | LN31D                                                                                        |     | LN32D                                                                                        |     | LN92D                                                                                        |
|--------|-----|----------------------------------------------------------------------------------------------|-----|----------------------------------------------------------------------------------------------|-----|----------------------------------------------------------------------------------------------|-----|----------------------------------------------------------------------------------------------|
| HThr30 | O   | Arg73 Cδ                                                                                     | O   | Arg73 Cδ                                                                                     | O   | Arg73 Cδ<br>Leu75 Cδ2                                                                        | O   | Leu75 Cδ2                                                                                    |
| HSer31 | Cα  | Leu75 Cδ2                                                                                    | Cα  | Leu75 Cδ2                                                                                    | Cα  | Leu75 Cδ2<br>Arg73 O                                                                         | Cα  | Leu75 Cδ2<br>Arg73 O                                                                         |
|        | Cβ  | Arg73 O                                                                                      |
|        |     |                                                                                              |     |                                                                                              | Oγ  | <b>Arg73 O</b>                                                                               | Oγ  | <b>Arg73 O</b>                                                                               |
|        | C   | Leu75 Cδ2                                                                                    |
|        | O   | Leu75 Cδ2                                                                                    | O   | Leu75 Cδ2                                                                                    | O   | Leu75 Cδ2<br>Leu75 Cα                                                                        | O   | Leu75 Cδ2                                                                                    |
| HAsp32 | N   | Leu75 Cδ2                                                                                    |
|        | Cα  | Leu75 Cδ2                                                                                    |
|        | Cγ  | Lys97 Nζ                                                                                     | Cγ  | Lys97 Nζ                                                                                     | Cγ  | Lys97 Nζ<br>Asn77 Nδ2                                                                        | Cγ  | Lys97 Nζ                                                                                     |
|        | Oδ1 | Lys97 Cε<br><b>Lys97 Nζ</b>                                                                  |
|        |     |                                                                                              |     |                                                                                              | Oδ2 | <b>Asn77 Nδ2</b>                                                                             | Oδ2 | <b>Asn77 Nδ2</b>                                                                             |
|        | C   | Leu75 Cδ2                                                                                    |     |                                                                                              |     |                                                                                              |     |                                                                                              |
| HTyr33 | Cγ  | Lys97 Cε                                                                                     |
|        | Cδ1 | Lys97 Cε                                                                                     | Cδ1 | Lys97 Cε                                                                                     |     |                                                                                              | Cδ1 | Lys97 Cε                                                                                     |
|        |     |                                                                                              | Cδ2 | Lys97 Cγ                                                                                     | Cδ2 | Lys97 Cγ                                                                                     |     |                                                                                              |
|        | Cε2 | Lys97 Cγ<br>Lys97 O                                                                          | Cε2 | Lys97 Cγ<br>Lys97 O                                                                          | Cε2 | Lys97 Cγ<br>Lys97 O<br>Lys97 C                                                               | Cε2 | Lys97 Cγ<br>Lys97 O<br>Lys97 C                                                               |
|        | Cζ  | Lys97 Cγ<br>Lys97 O                                                                          | Cζ  | Lys97 Cγ<br>Lys97 O                                                                          | Cζ  | Lys97 Cγ<br>Lys97 O                                                                          | Cζ  | Lys97 Cγ<br>Lys97 O<br>Asp101 Cβ                                                             |
|        | Oη  | Trp63 Cζ3<br>Trp63 Cη2<br>Lys97 C<br><b>Lys97 O</b><br>Asp101 Cβ                             | Oη  | Trp63 Cζ3<br>Trp63 Cη2<br>Lys97 C<br><b>Lys97 O</b><br>Asp101 Cβ                             | Oη  | Trp63 Cζ3<br>Trp63 Cη2<br>Lys97 C<br><b>Lys97 O</b><br>Asp101 Cβ                             | Oη  | Trp63 Cζ3<br>Trp63 Cη2<br>Lys97 C<br><b>Lys97 O</b><br>Asp101 Cβ                             |
|        |     |                                                                                              |     |                                                                                              |     |                                                                                              |     |                                                                                              |
| HTyr50 | Cε2 | Ser100 O                                                                                     |
|        | Cζ  | Ser100 O                                                                                     |
|        | Oη  | Arg21 Cz<br><b>Arg21 Nη1</b><br><b>Arg21 Nη2</b><br>Ser100 Cβ<br>Ser100 C<br><b>Ser100 O</b> | Oη  | Arg21 Cζ<br><b>Arg21 Nη1</b><br><b>Arg21 Nη2</b><br>Ser100 Cβ<br>Ser100 C<br><b>Ser100 O</b> | Oη  | Arg21 Cζ<br><b>Arg21 Nη1</b><br><b>Arg21 Nη2</b><br>Ser100 Cβ<br>Ser100 C<br><b>Ser100 O</b> | Oη  | Arg21 Cζ<br><b>Arg21 Nη1</b><br><b>Arg21 Nη2</b><br>Ser100 Cβ<br>Ser100 C<br><b>Ser100 O</b> |
|        |     |                                                                                              |     |                                                                                              |     |                                                                                              |     |                                                                                              |
|        |     |                                                                                              |     |                                                                                              |     |                                                                                              |     |                                                                                              |
|        |     |                                                                                              |     |                                                                                              |     |                                                                                              |     |                                                                                              |

VH (No.2)

|                |                                     | WT                                  |                                     | LN31D                               |                                              | LN32D                               |                                              | LN92D                               |
|----------------|-------------------------------------|-------------------------------------|-------------------------------------|-------------------------------------|----------------------------------------------|-------------------------------------|----------------------------------------------|-------------------------------------|
| HSer52         | C $\beta$                           | Asp101 C $\alpha$                   | C $\beta$                           | Asp101 C $\alpha$                   | C $\beta$                                    | Asp101 C $\alpha$                   | C $\beta$                                    | Asp101 C $\alpha$                   |
|                |                                     |                                     |                                     |                                     |                                              |                                     |                                              |                                     |
|                |                                     | Asp101 O $\delta$ 1                 |                                     | Asp101 O $\delta$ 1                 |                                              | Asp101 O $\delta$ 1                 |                                              | Asp101 O $\delta$ 1                 |
|                | O $\gamma$                          | Asp101 C $\alpha$                   | O $\gamma$                          | Asp101 C $\alpha$                   | O $\gamma$                                   | Asp101 C $\alpha$                   | O $\gamma$                                   | Asp101 C $\alpha$                   |
|                |                                     |                                     |                                     |                                     |                                              |                                     |                                              |                                     |
|                | Asp101 C $\gamma$                   |                                     | Asp101 C $\gamma$                   |                                     | Asp101 C $\gamma$                            |                                     | Asp101 C $\gamma$                            |                                     |
|                | <b>Asp101 O<math>\delta</math>1</b> |                                     | <b>Asp101 C<math>\delta</math>1</b> |                                     | <b>Asp101 C<math>\delta</math>1</b>          |                                     | <b>Asp101 C<math>\delta</math>1</b>          |                                     |
| HTyr53         | C $\beta$                           | Leu75 C $\delta$ 1                  | C $\beta$                           | Leu75 C $\delta$ 1                  | C $\beta$                                    | Leu75 C $\delta$ 1                  | C $\beta$                                    | Leu75 C $\delta$ 1                  |
|                |                                     |                                     |                                     |                                     |                                              |                                     |                                              |                                     |
|                |                                     | Leu75 C $\delta$ 2                  |                                     | Leu75 C $\delta$ 2                  |                                              | Leu75 C $\delta$ 2                  |                                              | Leu75 C $\delta$ 2                  |
|                | C $\gamma$                          | Leu75 C $\delta$ 1                  | C $\gamma$                          | Leu75 C $\delta$ 1                  | C $\gamma$                                   | Leu75 C $\delta$ 1                  | C $\gamma$                                   | Leu75 C $\delta$ 1                  |
|                |                                     |                                     |                                     |                                     |                                              |                                     |                                              |                                     |
|                | C $\delta$ 1                        | Trp63 C $\eta$ 2                    | C $\delta$ 1                        | Trp63 C $\eta$ 2                    | C $\delta$ 1                                 | Trp63 C $\eta$ 2                    | C $\delta$ 1                                 | Trp63 C $\eta$ 2                    |
|                |                                     |                                     |                                     |                                     |                                              |                                     |                                              |                                     |
|                |                                     |                                     |                                     |                                     |                                              | Leu75 C $\delta$ 1                  |                                              | Leu75 C $\delta$ 1                  |
|                |                                     | Asp101 C $\beta$                    |                                     | Asp101 C $\beta$                    |                                              | Asp101 C $\beta$                    |                                              | Asp101 C $\beta$                    |
|                |                                     | Asp101 C $\gamma$                   |                                     | Asp101 C $\gamma$                   |                                              | Asp101 C $\gamma$                   |                                              | Asp101 C $\gamma$                   |
|                |                                     | Asp101 O $\delta$ 1                 |                                     | Asp101 O $\delta$ 1                 |                                              | Asp101 O $\delta$ 1                 |                                              | Asp101 O $\delta$ 1                 |
|                | C $\epsilon$ 1                      | Trp63 C $\zeta$ 2                   | C $\epsilon$ 1                      | Trp63 C $\zeta$ 2                   | C $\epsilon$ 1                               | Trp63 C $\zeta$ 2                   | C $\epsilon$ 1                               | Trp63 C $\zeta$ 2                   |
|                |                                     |                                     |                                     |                                     |                                              |                                     |                                              |                                     |
|                |                                     | Trp63 C $\eta$ 2                    |                                     | Trp63 C $\eta$ 2                    |                                              | Trp63 C $\eta$ 2                    |                                              | Trp63 C $\eta$ 2                    |
|                |                                     | Asp101 C $\beta$                    |                                     | Asp101 C $\beta$                    |                                              | Asp101 C $\beta$                    |                                              | Asp101 C $\beta$                    |
|                |                                     | Asp101 C $\gamma$                   |                                     | Asp101 C $\gamma$                   |                                              | Asp101 C $\gamma$                   |                                              | Asp101 C $\gamma$                   |
|                |                                     | Asp101 O $\delta$ 1                 |                                     | Asp101 O $\delta$ 1                 |                                              | Asp101 O $\delta$ 1                 |                                              | Asp101 O $\delta$ 1                 |
|                | C $\delta$ 2                        | Trp62 C $\epsilon$ 3                | C $\delta$ 2                        | Trp62 C $\epsilon$ 3                | C $\delta$ 2                                 | Trp62 C $\epsilon$ 3                | C $\delta$ 2                                 | Trp62 C $\epsilon$ 3                |
|                |                                     |                                     |                                     |                                     |                                              |                                     |                                              |                                     |
|                |                                     | Trp62 C $\zeta$ 3                   |                                     | Trp63 C $\zeta$ 3                   |                                              | Trp62 C $\zeta$ 3                   |                                              | Trp62 C $\zeta$ 3                   |
|                | Leu75 C $\delta$ 1                  |                                     | Leu75 C $\delta$ 1                  |                                     | Leu75 C $\delta$ 1                           |                                     | Leu75 C $\delta$ 1                           |                                     |
| C $\epsilon$ 2 | Trp62 C $\zeta$ 3                   | C $\epsilon$ 2                      | Trp62 C $\epsilon$ 3                | C $\epsilon$ 2                      | Trp62 C $\epsilon$ 3                         | C $\epsilon$ 2                      | Trp62 C $\epsilon$ 3                         |                                     |
|                |                                     |                                     |                                     |                                     |                                              |                                     |                                              |                                     |
|                | Trp62 C $\eta$ 3                    |                                     | Trp62 C $\zeta$ 3                   |                                     | Trp62 C $\zeta$ 3                            |                                     | Trp62 C $\zeta$ 3                            |                                     |
|                |                                     |                                     | C $\zeta$ Trp63 C $\zeta$ 2         |                                     | O $\eta$ <b>Asp103 N<math>\delta</math>2</b> |                                     | O $\eta$ <b>Asp103 N<math>\delta</math>2</b> |                                     |
| HSer54         | N                                   | <b>Asp101 O<math>\delta</math>1</b> | N                                   | <b>Asp101 O<math>\delta</math>1</b> | N                                            | <b>Asp101 O<math>\delta</math>1</b> | N                                            | <b>Asp101 O<math>\delta</math>1</b> |
|                | C $\alpha$                          | Asp101 O $\delta$ 1                 | C $\alpha$                          |                                     | C $\alpha$                                   | Asp101 O $\delta$ 1                 | C $\alpha$                                   | Asp101 O $\delta$ 1                 |
|                | C $\beta$                           | Asp101 C $\gamma$                   | C $\beta$                           | Asp101 C $\gamma$                   | C $\beta$                                    | Asp101 C $\gamma$                   | C $\beta$                                    | Asp101 C $\gamma$                   |
|                |                                     |                                     |                                     |                                     |                                              |                                     |                                              |                                     |
|                |                                     | Asp101 O $\delta$ 1                 |                                     | Asp101 O $\delta$ 1                 |                                              | Asp101 O $\delta$ 1                 |                                              | Asp101 O $\delta$ 1                 |
|                |                                     | Asp101 O $\delta$ 2                 |                                     | Asp101 O $\delta$ 2                 |                                              | Asp101 O $\delta$ 2                 |                                              | Asp101 O $\delta$ 2                 |
|                |                                     | Asn103 N $\delta$ 2                 |                                     | Asn103 N $\delta$ 2                 |                                              | Asn103 N $\delta$ 2                 |                                              | Asn103 N $\delta$ 2                 |
| O $\gamma$     | Asp101 C $\gamma$                   | O $\gamma$                          | Asp101 C $\gamma$                   | O $\gamma$                          | Asp101 C $\gamma$                            | O $\gamma$                          | Asp101 C $\gamma$                            |                                     |
|                |                                     |                                     |                                     |                                     |                                              |                                     |                                              |                                     |
|                | <b>Asp101 O<math>\delta</math>1</b> |                                     | <b>Asp101 O<math>\delta</math>1</b> |                                     | <b>Asp101 O<math>\delta</math>1</b>          |                                     | <b>Asp101 O<math>\delta</math>1</b>          |                                     |
|                | <b>Asp101 O<math>\delta</math>2</b> |                                     | <b>Asp101 O<math>\delta</math>2</b> |                                     | <b>Asp101 O<math>\delta</math>2</b>          |                                     | <b>Asp101 O<math>\delta</math>2</b>          |                                     |



VH (No.3)

|                 | WT             |                                          | LN31D          |                                          | LN32D          |                                          | LN92D          |                                          |
|-----------------|----------------|------------------------------------------|----------------|------------------------------------------|----------------|------------------------------------------|----------------|------------------------------------------|
| HSer56          | C $\beta$      | Gly102 N                                 |
|                 |                | Gly102 C $\alpha$                        |
|                 | O $\gamma$     | Gly102 N                                 |
|                 |                | Gly102 C $\alpha$<br>Asp101 O $\delta$ 1 |                | Gly102 C $\alpha$<br>Asp101 O $\delta$ 1 |                | Gly102 C $\alpha$<br>Asp101 O $\delta$ 1 |                | Gly102 C $\alpha$<br>Asp101 C $\delta$ 1 |
| HTyr58          | C $\gamma$     | Arg21 N $\eta$ 2                         |
|                 | C $\delta$ 1   | Arg21 N $\eta$ 2                         | C $\delta$ 1   | Arg21 N $\eta$ 2                         | C $\delta$ 1   | Arg21 N $\eta$ 2                         | C $\delta$ 1   | Arg21 N $\eta$ 2                         |
|                 | C $\epsilon$ 1 | Arg21 N $\eta$ 2                         | C $\epsilon$ 1 | Arg21 N $\eta$ 2                         | C $\epsilon$ 1 | Arg21 N $\eta$ 2                         | C $\epsilon$ 1 | Arg21 N $\eta$ 2                         |
|                 | C $\epsilon$ 2 | Ser100 O                                 |
|                 | C $\zeta$      | Arg21 N $\eta$ 2                         | C $\zeta$      | Arg21 N $\eta$ 2                         | C $\zeta$      | Arg21 N $\eta$ 2<br>Ser100 O             | C $\zeta$      | Arg21 N $\eta$ 2<br>Ser100 O             |
|                 |                |                                          |                |                                          |                | Asp101 C<br>Gly102 N                     |                | Asp101 C<br>Gly102 N                     |
|                 |                | Gly102 C $\alpha$                        |
| HTrp98          | C $\epsilon$ 3 | Lys97 C $\gamma$                         |
|                 |                | Lys97 C $\delta$                         |
|                 |                | Lys97 C $\epsilon$                       |
|                 | C $\zeta$ 2    | Ser100 C $\beta$                         |
|                 |                | Ser100 O $\gamma$                        |
|                 | C $\zeta$ 3    | Lys97 C $\alpha$                         |
|                 |                | Lys97 C $\beta$                          |
|                 |                | Lys97 C $\gamma$                         |
|                 |                | Lys97 C $\delta$                         |
|                 | C $\eta$ 2     | Lys97 C $\alpha$                         |
| Lys97 C $\beta$ |                | Lys97 C $\beta$                          |                | Lys97 C $\beta$                          |                | Lys97 C $\beta$                          |                |                                          |
| HAsp99          | C $\gamma$     |                                          | C $\gamma$     |                                          | C $\gamma$     | Asp77 N $\delta$ 2                       | C $\gamma$     | Asp77 N $\delta$ 2                       |
|                 |                | Lys97 N $\zeta$                          |
|                 | O $\delta$ 1   |                                          | O $\delta$ 1   |                                          | O $\delta$ 1   | Lys97 C $\delta$                         | O $\delta$ 1   | Lys97 C $\delta$                         |
|                 |                |                                          |                | Lys97 C $\epsilon$                       |                | Lys97 C $\epsilon$                       |                | Lys97 C $\epsilon$                       |
|                 | O $\delta$ 2   | Asn77 N $\delta$ 2                       | O $\delta$ 2   | Asp77 N $\delta$ 2                       | O $\delta$ 2   | Asp77 N $\delta$ 2                       | O $\delta$ 2   | Asp77 N $\delta$ 2                       |
|                 |                | Lys97 N $\zeta$                          |                | Lys97 N $\zeta$                          |                | Asn77 C $\gamma$<br>Lys97 N $\zeta$      |                | Lys97 N $\zeta$                          |

Contacting atoms in HEL in the mutant Fv-HEL complexes are listed. The distances between each pair of atoms involved in van der Waals interactions and in hydrogen bonds are as follows; C-C; 4.1Å, C-N; 3.8Å, C-O; 3.7Å, O-O; 3.3Å, O-N; 3.4Å, N-N; 3.4Å. The atoms involved in hydrogen bonds and salt bridges are shown in red and in red italics, respectively. Calculations were performed with CONTACT in the CCP4 program suite.

<sup>a</sup> Data of 2DQJ (55)

**Supplemental Table S5****The number of interactions between each mutant Fv and HEL in the complexes compared to those in the wild-type Fv and HEL complex**

| Complex        | Total     | Conserved | Gain | Loss |
|----------------|-----------|-----------|------|------|
| Wild type (VH) | 86        |           |      |      |
| (VL)           | 46        |           |      |      |
| LN31D (VH)     | 88 (+2)   | 84        | 4    | 2    |
| (VL)           | 46 ( 0)   | 44        | 2    | 2    |
| LN32D (VH)     | 104 (+18) | 83        | 21   | 3    |
| (VL)           | 40 (-6)   | 38        | 2    | 8    |
| LN92D (VH)     | 101 (+15) | 84        | 17   | 2    |
| (VL)           | 45 (-1)   | 41        | 4    | 5    |

The results presented in this table are a summary of results listed in Supplemental Table S4.

**Supplemental Table S6 Thermodynamic parameters of mutant Fv–HEL interactions at 30 °C and pH 7.2 in phosphate buffer**

Experimental protocols are described in the main text. Data represent the averages of at least three independent measurements. Errors of all values are within 5% for several experiments. The abbreviations used are as follows:  $n$ , stoichiometry;  $K_a$ , binding constant;  $\Delta G$ ,  $\Delta H$ ,  $\Delta S$ , and  $\Delta C_p$ , changes in Gibbs energy, binding enthalpy, entropy, and heat capacity, respectively.

| Mutant             | $n$  | $K_a$<br>[ $\times 10^7 M^{-1}$ ] | $\Delta G$<br>[kJ mol <sup>-1</sup> ] | $\Delta\Delta G^a$ | $\Delta H$<br>[kJ mol <sup>-1</sup> ] | $\Delta\Delta H^a$ | $T\Delta S$<br>[kJ mol <sup>-1</sup> ] | $T\Delta\Delta S^a$ | $\Delta S$<br>[kJ mol <sup>-1</sup> K <sup>-1</sup> ] | $\Delta\Delta S^a$ | $\Delta C_p^b$<br>[kJ mol <sup>-1</sup> K <sup>-1</sup> ] | $\Delta\Delta C_p^a$ |
|--------------------|------|-----------------------------------|---------------------------------------|--------------------|---------------------------------------|--------------------|----------------------------------------|---------------------|-------------------------------------------------------|--------------------|-----------------------------------------------------------|----------------------|
| Wild type          | 1.05 | 82.1                              | -51.7                                 | 0                  | -99.7                                 | 0                  | -48.0                                  | 0                   | -0.158                                                | 0                  | -1.53                                                     | 0                    |
| HS52A              | 0.95 | 130                               | -52.9                                 | -0.3               | -88.8                                 | 10.9               | -35.9                                  | 12.1                | -0.118                                                | 0.040              | -0.98                                                     | 0.55                 |
| HS54A              | 0.96 | 184                               | -53.7                                 | -2.1               | -95.1                                 | 4.6                | -41.4                                  | 6.6                 | -0.137                                                | 0.021              | -0.77                                                     | 0.76                 |
| HS56A              | 0.88 | 131                               | -52.9                                 | 3.7                | -86.5                                 | 13.2               | -37.6                                  | 10.4                | -0.124                                                | 0.034              | -2.08                                                     | -0.55                |
| LY50F <sup>c</sup> | 1.05 | 11.2                              | -46.7                                 | 5.0                | -74.8                                 | 24.9               | -28.2                                  | 19.8                | -0.093                                                | 0.065              | -1.77                                                     | -0.24                |
| LS91A <sup>c</sup> | 1.04 | 36.3                              | -49.7                                 | 2.0                | -88.7                                 | 11                 | -39.1                                  | 8.9                 | -0.129                                                | 0.029              | -1.62                                                     | -0.09                |
| LS93A <sup>c</sup> | 1.07 | 74.1                              | -51.4                                 | 0.3                | -91.2                                 | 8.5                | -39.7                                  | 8.3                 | -0.131                                                | 0.027              | -1.86                                                     | -0.33                |

<sup>a</sup>  $\Delta\Delta H$ ,  $T\Delta\Delta S$ ,  $\Delta\Delta S$  and  $\Delta\Delta C_p$  are the differences in binding enthalpy, entropy and heat capacity between mutant and wild type.

<sup>b</sup> The change in heat capacity were calculated by performing measurements at four temperatures, 25°C , 30°C, 35°C and 40 °C.

<sup>c</sup> Data are from a previous work, Yokota *et al.*, 2003 (reference (48) in the text).

Supplemental Fig. S1

Multiple sequence alignment for germline variable genes from the immunoglobulin loci of mouse

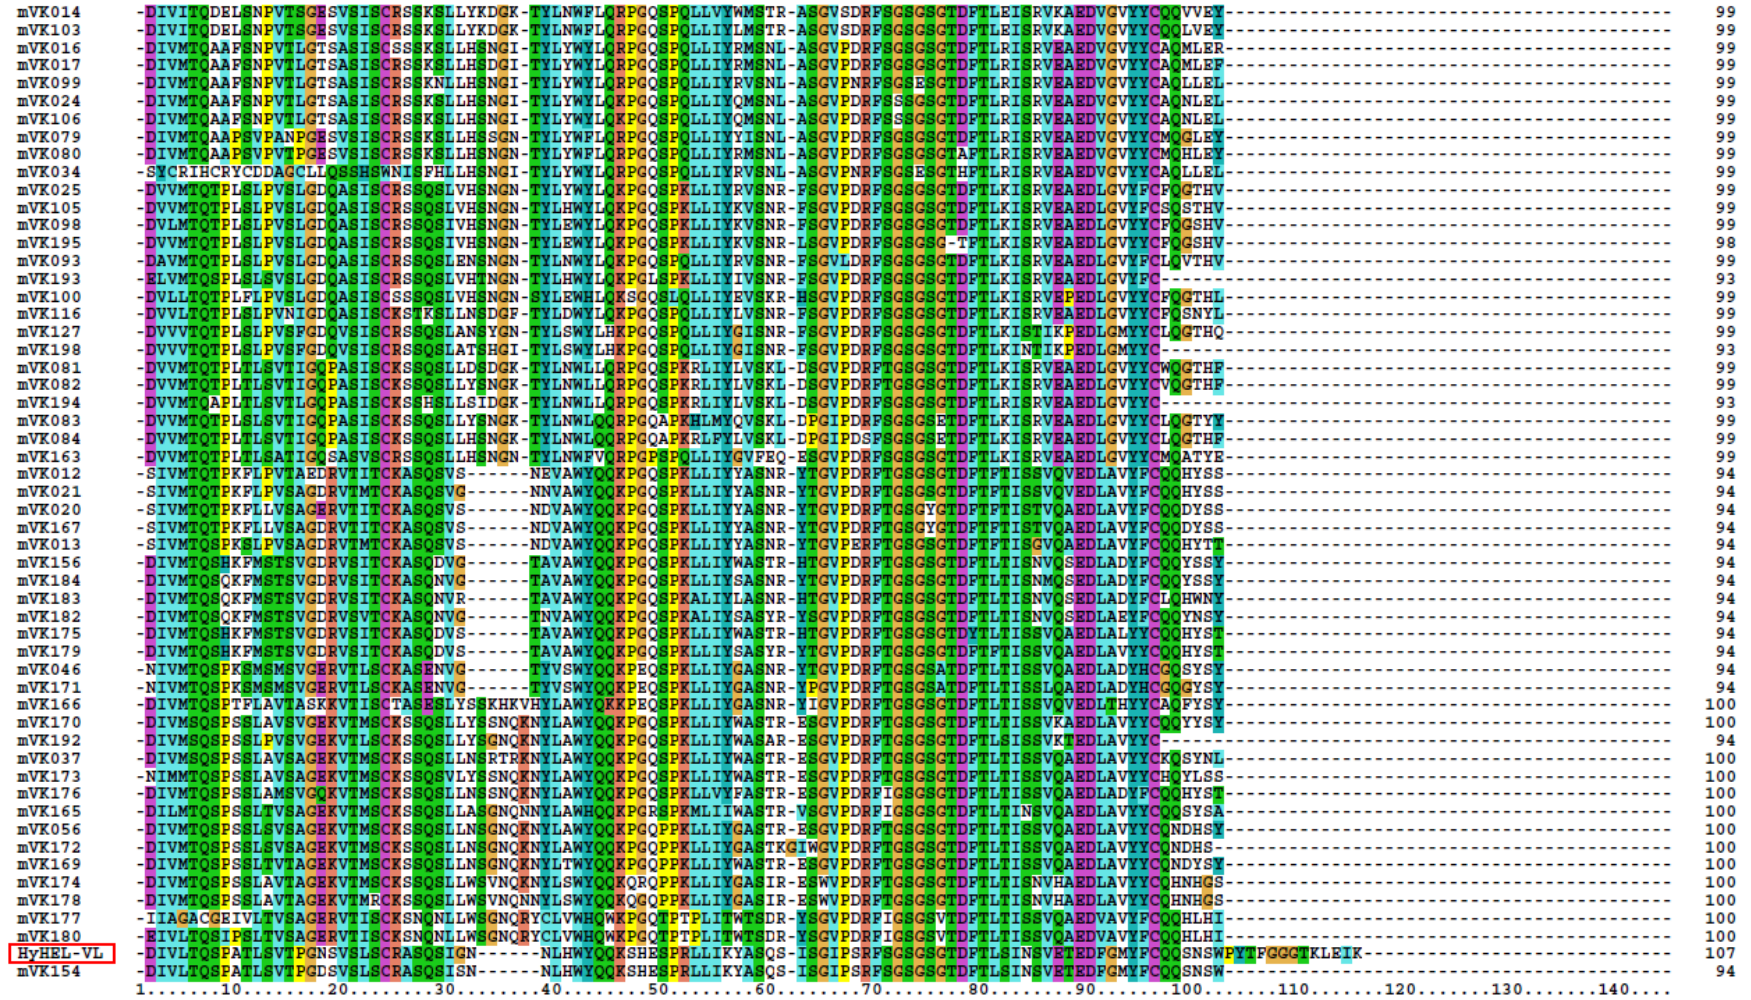

```

mVK152 -DIVLTQSPATLSEVTPGDRVSLSCRASQSIISN---YLHWYQQRSHSPRLLIKAYASQS-ISGIPSRFPGSGSGDFLTLINSVETEDFGMYFCQGSNSW-----94
mVK160 -DIVMTQSPATLSEVTPGDRVSLSCRASQSIISD---YLHWYQQRSHSPRLLIKAYASQS-ISGIPSRFPGSGSGDFLTLINSVETEDFGMYFCQGNHGSF-----94
mVK162 -DILLTQSPATLSEVTPGETVSLSCRASQSIYK---NLHWYQQRSHSPRLLIKAYASDS-ISGIPSRFPGSGSGDYTLTLINSVKPEDEGIYYCLQGYSE-----94
mVK149 -DILLTQSPAILSEVTPGERVSPFCRASQSIQGT---SLHWYQQRSHSPRLLIKAYASDS-ISGIPSRFPGSGSGDFLTLINSVSEEDDIADYYCQGSNSW-----94
mVK065 -QIVLTQSPAIMSASPGEKVTMTCSASSSVS---YMYWYQQRKPGSSPRLLIYDTSNLS-ASGVVPRFPGSGSGTSYSLTISRMEADAATYYCQWSSY-----93
mVK074 -DIELTQSPAIMSASPGERVTMTCSASSSIR---YIYWYQQRKPGSSPRLLIYDTSNV-APGVVPRFPGSGSGTSYSLTISRMEADAATYYCQWSSY-----93
mVK057 -QIVLTQSPAIMSASPGEKVTMTCSASSSVS---YMYWYQQRKPGSSPRLLIYDTSNLS-VSGVPAFFPGSGSGTSYSLTISRMEADAATYYCQWSSY-----93
mVK060 -QIVLTQSPAIMSASPGEKVTMTCSASSSVSS---SYLYWYQQRKPGSSPKLWIYDTSNLS-ASGVPAFFPGSGSGTSYSLTISRMEADAATFYCQWSSY-----95
mVK135 -QIVLTQSPAIMSASLGERVTMTCSASSSVSS---SYLHWYQQRKPGSSPKLWIYDTSNLS-ASGVPAFFPGSGSGTSYSLTISRMEADAATYYCQWSSY-----95
mVK031 -QIVLTQSPAIMSASPGEKVTMTCSASSSVSS---SYLYWYQQRKSGSSPKLWIYDTSNLS-ASGVPAFFPGSGSGTSYSLTISRMEADAATYYCQWSSN-----95
mVK044 -QIVLTQSPAIMSASPGEKVTMTCSASSSVS---YMHWYQQRKPGSSPKLWIYDTSNLS-ASGVPAFFPGSGSGTSYSLTISRMEADAATYYCQWSSN-----93
mVK138 -QIVLTQSPALMSASPGEKVTMTCSASSSVS---YMYWYQQRKPRSSPKPWIYDTSNLS-ASGVPAFFPGSGSGTSYSLTISRMEADAATYYCQWSSN-----93
mVK040 -QIVLTQSPAILSASPGEKVTMTCSASSSVS---YMHWYQQRKPGSSPKPWIYDTSNLS-ASGVPAFFPGSGSGTSYSLTISRVEADAATYYCQWSSN-----93
mVK063 -QIVLTQSPAIMSASPGEKVTMTCSASSSVS---YMYWYQQRKPGSSPKPWIYDTSNLS-ASGVPAFFPGSGSGTSYSLTISRMEADAATYYCQWSSY-----93
mVK070 -QIVLTQSPAILSASPGEKVTMTCSASSSVS---YMYRQQRKPGSSPKPWIYDTSNLS-ASGVPAFFPGSGSGTSYSLTISRMEADAATYYCQWSSY-----93
mVK042 -QIVLTQSPAIMSASPGEKVTMTCSASSSIS---YMHWYQQRKPGSSPKPWIYDTSNLS-ASGVPAFFPGSGSGTSYSLTISRMEADAATYYCQWSSY-----93
mVK059 -QIVLTQSPAIMSASPGEKVTMTCSASSSVS---YMHWYQQRKSGTSPKRWIYDTSNLS-ASGVPAFFPGSGSGTSYSLTISRMEADAATYYCQWSSN-----93
mVK032 -QILLTQSPAIMSASPGEKVTMTCSASSSVS---YMHWYQQRKPGSSPKPWIYDTSNLS-ASGVPAFFPGSGSGTSYSLTISRMEADAATYYCQWSSY-----93
mVK061 -QIVLTQSPAIMSASPGEKVTMTCSASSSVSS---SYLYWYQQRKPGSSPKLWIYDTSNLS-ASGVPAFFPGSGSGTSYSLTISRMEADAATYYCQWSSY-----95
mVK066 -QIVLTQSPAIMSASPGEKVTMTCSASSSVN---YMHWYQQRKPGSSPKLWIYDTSNLS-ALGVPAFFPGSGSGTSYSLTISRMEADAATYYCQWSSY-----93
mVK062 -QIVLTQSPAIMSASLGERVTMTCSASSSVS---YMHWYQQRKSGTSPKRWIYDTSNLS-ASGVPAFFPGSGSGTSYSLTISRMEADAATYYCQWSSY-----93
mVK068 -QIVLTQSPAIMSASPGEKVTMTCSASSSVS---YMHWYQQRKPGTSPKLWIYDTSNLS-ASGVPAFFPGSGSGTSYSLTISRMEADAATYYCQWSSY-----93
mVK067 -ENVLTQSPAIMAASLGERVTMTCSASSSVSS---SYLHWYQQRKSGTSPKRWIYDTSNLS-ASGVPAFFPGSGGAGISYSLTISRMEADAATYYCQWSSY-----95
mVK144 -ENVLTQSPAIMAASLQKVTMTCSASSSVSS---SYLHWYQQRKSGASPKPLIHRDTSNLS-ASGVPAFFPGSGSGTSYSLTISRVEADAATYYCQWSSY-----95
mVK201 -ENVLTQSPAIMAASPGEKVTMTCSASSSVSS---SNLHWYQQRKSGTSPKRWIYDTSNLS-ASGVPAFFPGSGSGTSYSLTISRVEADAATYYCQWSSY-----95
mVK064 -ENVLTQSPAIMSASPGEKVTMTCSASSSVSS---SYLHWYQQRKSGASPKLWIYDTSNLS-ASGVPAFFPGSGSGTSYSLTISRVEADAATYYCQWSSY-----95
mVK143 -ENVLTQSPAIMSASPGEKVTMTCSASSSVS---YMHWYQQRKSGTSPKLWIYDTSNLS-ASGVPAFFPGSGSGTNSYSLTISRMEADAATYYCQWSSY-----93
mVK147 -ENVLTQSPAIMSASLGERVTMTCSASSSVN---YMYWYQQRKSDASPKLWIYDTSNLS-APGVPAFFPGSGSGTNSYSLTISRMEADAATYYCQWSSY-----93
mVK058 -EIVLTQSPALMAASPGEKVTMTCSASSSIS---SYLHWYQQRKSGISPKPWIYDTSNLS-ASGVPAFFPGSGSGTSYSLTISRMEADAATYYCQWSSY-----95
mVK069 -EIVLTQSPALMAASPGEKVTMTCSASSSIS---SNLHWYQQRKSGTSPKRWIYDTSNLS-ASGVVPRFPGSGSGTSYSLTISRMEADAATYYCQWSSY-----95
mVK141 -EIGLIQSTIMAAASPGEKVTMTCSASSSVSS---SYLHWYQQRKSGASPKLWIYDTSNLS-ASGVSAHFGSGSGTSYSLTISRMEADAATYYCQWSSY-----94
mVK130 -EIVLTQSPAIMAASLQKVTMTCSASS--SV---SYMHWYQQRKSGTSPKRWIYDTSNLS-ASGVPAFFPGSGSGTSYSLTISRMEADAATYYCQWSSY-----93
mVK125 -EILLTQSPAIMAASPGEKVTMTCSASSSVS---YMNWYQQRKPGSSPKPWIYDTSNLS-ASGVPAFFPGSGSGTSYSLTISRMEADAATYYCQWSSY-----93
mVK123 -EMVLTQSPVITMAASPGEKVTMTCSASSSIS---NYLHWYQQRKPGSSPKLWIYDTSNLS-ASGVVPRFPGSGSGTSYSLTISRMEADAATYYCQWSSY-----95
mVK124 -EIVLTQSPPTMAASPGEKVTMTCSASSSIS---NYLHWYQQRKPGSSPKLWIYDTSNLS-ASGVPAFFPGSGSGTSYSLTISRMEADAATYYCQWSSY-----95
mVK009 -DIVLTQSPASLAVSLGQRATISCRASQSVSTSY---SLMQWYQQRKPGQPPKLLIYASNV-KSGVPAFFPGSGSGTDFLNLHHPVEEDDIAMYFCQGSRWK-----98
mVK191 -DIVLTQSPASLAVSLGQRATISCRASQSVSTSY---SLMQWYQQRKPGQPPKLLIYASNV-KSGVPAFFPGSGSGTDFLNLHHPVEEDDIAMYFCQGSRWK-----98
mVK190 -DIVLTQSPASLAVSLGQRATISCRASQSVSTSY---SFMNWYQQRKPGQPPKLLIYASNV-KSGVPAFFPGSGSGTDFLNLHHPVEEDDIAMYFCQGSKEV-----98
mVK039 -NIVLTQSPASLAVSLGQRATISCRASQSVSTSY---SFMHWYQQRKPGQPPKLLIYASNV-KSGVPAFFPGSGSGTDFLNLHHPVEEDDIAMYFCQGSNNED-----98
mVK051 -DIVLTQSPASLAVSLGQRATISCRASQSVSTSY---SFMHWYQQRKPGQPPKLLIYASNV-KSGVPAFFPGSGSGTDFLNLHHPVEEDDIAMYFCQGSNNED-----98
mVK054 -DIVLTQSPASLAVSLGQRATISCRASQSVSTSY---SLMHWYQQRKPGQPPKLLIYASNV-KSGVPAFFPGSGSGTDFLNLHHPVEEDDIAMYFCQGSNNED-----98
mVK022 -DIVLTQSPASLAVSLGQRATISCRASQSVSTSY---SYMHWYQQRKPGQPPKLLIYASNV-KSGVPAFFPGSGSGTDFLNLHHPVEEDDIAMYFCQGSNNED-----98
mVK023 -DIVLTQSPASLAVSLGQRATISCRASQSVSTSY---SYMHWYQQRKPGQPPKLLIYASNV-KSGVPAFFPGSGSGTDFLNLHHPVEEDDIAMYFCQGSNNED-----98
mVK053 -DIVLTQSPASLAVSLGQRATISCRASQSVSTSY---SYMHWYQQRKPGQPPKLLIYASNV-KSGVPAFFPGSGSGTDFLNLHHPVEEDDIAMYFCQGSNNED-----98
mVK186 -DIVLTQSPASLAVSLGQRATISCRASQSVSTSY---SYMHWYQQRKPGQPPKLLIYASNV-KSGVPAFFPGSGSGTDFLNLHHPVEEDDIAMYFCQGSNNED-----98
mVK188 -DIVLTQSPASLAVSLGQRATISCRASQSVSTSY---SYMHWYQQRKPGQPPKLLIYASNV-KSGVPAFFPGSGSGTDFLNLHHPVEEDDIAMYFCQGSNNED-----98
mVK189 -DIVLTQSPASLAVSLGQRATIFCRASQSVSTSY---SYMHWYQQRKPGQPPKLLIYASNV-KSGVPAFFPGSGSGTDFLNLHHPVEEDDIAMYFCQGSNNED-----98
mVK002 -DIQMTQTTSSLSASLGDRTVITSCRASQDISN---YLNWYQQRKPGDGTVKKLLIYASNV-KSGVPAFFPGSGSGTDFLNLHHPVEEDDIAMYFCQGSNNED-----94
mVK026 -DIQMTQTTSSLSASLGDRTVITSCRASQDISN---YLNWYQQRKPGDGTVKKLLIYASNV-KSGVPAFFPGSGSGTDFLNLHHPVEEDDIAMYFCQGSNNED-----94
mVK028 -DIQMTQTTSSLSASLGDRTVITSCRASQDISN---YLNWYQQRKPGDGTVKKLLIYASNV-KSGVPAFFPGSGSGTDFLNLHHPVEEDDIAMYFCQGSNNED-----94
mVK119 -DIQMTQTTSSLSASLGDRTVITSCRASQDISN---YLNWYQQRKPGDGTVKKLLIYASNV-KSGVPAFFPGSGSGTDFLNLHHPVEEDDIAMYFCQGSNNED-----94
mVK001 -DIQMTQTTSSLSASLGDRTVITSCRASQDISN---YLNWYQQRKPGDGTVKKLLIYASNV-KSGVPAFFPGSGSGTDFLNLHHPVEEDDIAMYFCQGSNNED-----94
mVK005 -DIQMTQTTSSLSASLGDRTVITSCRASQDISN---YLNWYQQRKPGDGTVKKLLIYASNV-KSGVPAFFPGSGSGTDFLNLHHPVEEDDIAMYFCQGSNNED-----94
mVK027 -DIQMTQTTSSLSASLGDRTVITSCRASQDISN---YLNWYQQRKPGDGTVKKLLIYASNV-KSGVPAFFPGSGSGTDFLNLHHPVEEDDIAMYFCQGSNNED-----94
mVK004 -DIQMTQTTSSLSASLGDRTVITSCRASQDISN---YLNWYQQRKPGDGTVKKLLIYASNV-KSGVPAFFPGSGSGTDFLNLHHPVEEDDIAMYFCQGSNNED-----94
1.....10.....20.....30.....40.....50.....60.....70.....80.....90.....100.....110.....120.....130.....140.....

```



The light chain of HyHEL-10 (enclosed in red square) aligned with other sequences of the immunoglobulin kappa variable group (IGVK) of mouse from an integrative database of germline variable genes, VBASE2 (<http://www.vbase2.org/vbase2.php>) (Retter, *et. al.* (2005)\*) using ClustalX (2.0.11) (<http://bips.u-strasbg.fr/fr/Documentation/ClustalX/>) multiple sequence alignment tool. In the resultant alignment, sequence residues at conserved positions are colored automatically according to the physiochemical characteristics of the amino acids as follows: Gly, in *orange*; Cys, in *salmon*; Arg and Lys, in *red*; Asp and Glu, in *purple*; Ala, Ile, Leu, Met, Phe, Trp and Val, in *blue*; His and Tyr, in *sea green*; Gln, Ser and Thr, in *lime green*; Pro, in *green yellow*.

\* Retter I, Althaus HH, Münch R, Müller W: VBASE2, an integrative V gene database. *Nucleic Acids Res.* 2005 Jan 1; 33 (Database issue):D671-4.



### Supplemental Fig. S2

#### Temperature dependence of the enthalpy change of the interaction between HyHEL-10 Fv and HEL.

Experimental conditions are provided in the main text. Symbols used: *solid squares* (■), wild type; *open circles* (○), L-N31A; *solid circles* (●), L-N31D; *solid triangles* (▲), L-N32D; *solid crosses* (×), L-N92D.

There is no data of L-N32A because the measurement for the association between the LN32A and HEL was performed only at one temperature (30 °C) due to lack of its mutant sample.

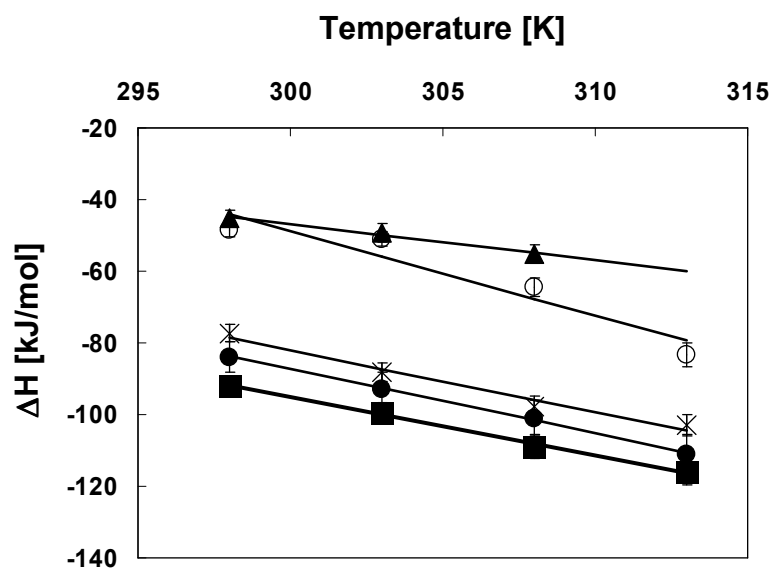

Supplement: supp_M109.089623_jbc.M109.089623-1.pdf [file supp_M109.089623_jbc.M109.089623-1.pdf]
